# Supplementary material
Source: Springer Nature journal article supplement (https://www.springermedizin.de/resource/supplementary/12935_2009_270_MOESM5_ESM.pdf/9540188)

# A

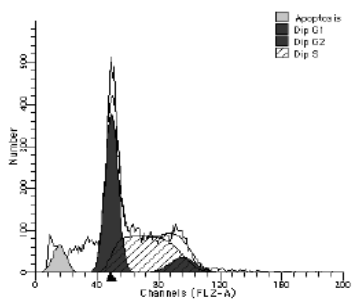

Control

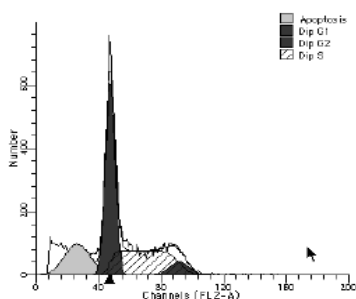

C225

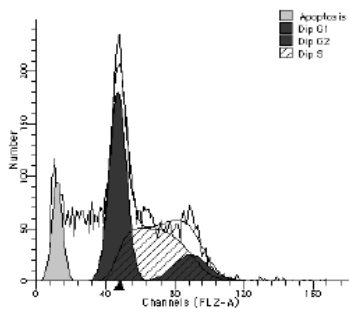

8Gy

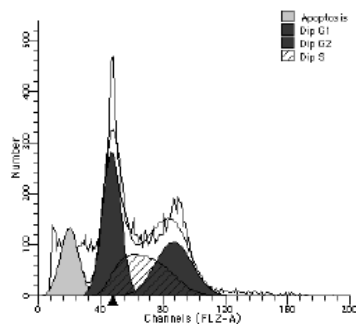

C225+8Gy

# B

The percentage of cell cycle distribution

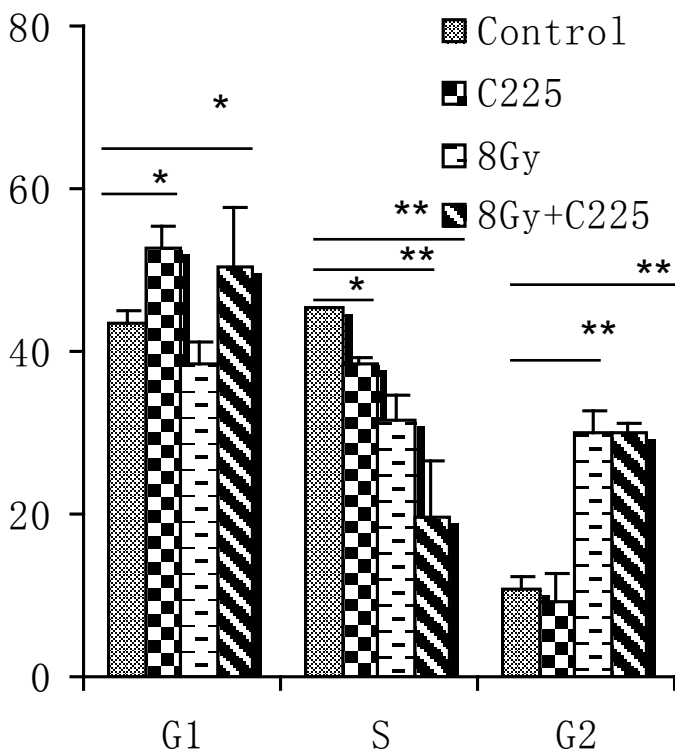

Supplement: MOESM5 [file 9540188]
